# Supplementary material for: Clinical impact of bile‐derived exosomal microRNAs as novel diagnostic and prognostic biomarkers for biliary tract cancers
Source: PubMed Central journal article supplement — Cancer Sci. 2022 Oct 17;114(1):295–305. doi: 10.1111/cas.15597 (PMC9807502; doi:10.1111/cas.15597), 2022-10-17
Supplement: CAS-114-295-s001.pdf [file CAS-114-295-s001.pdf]

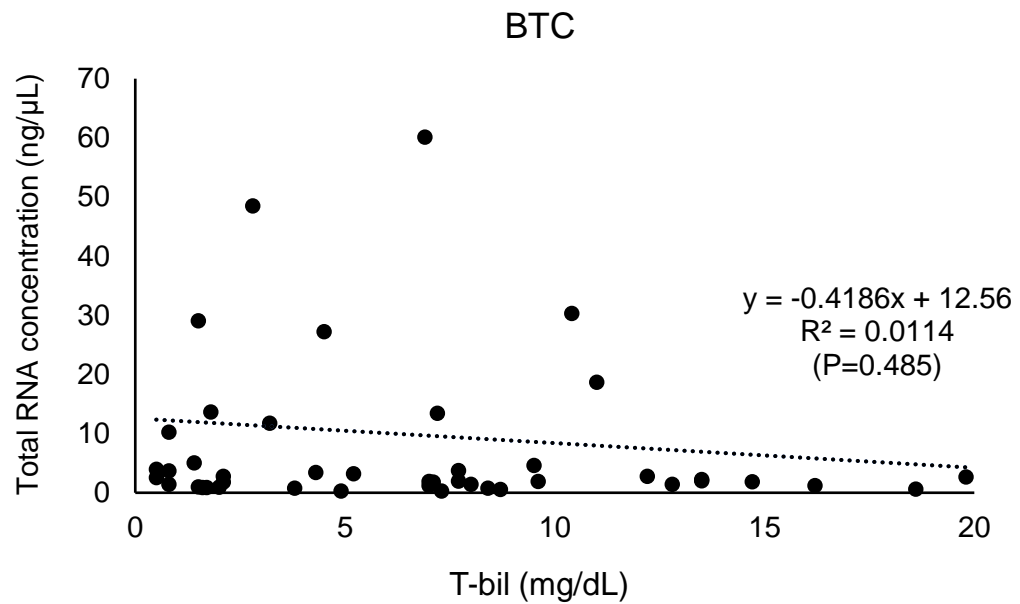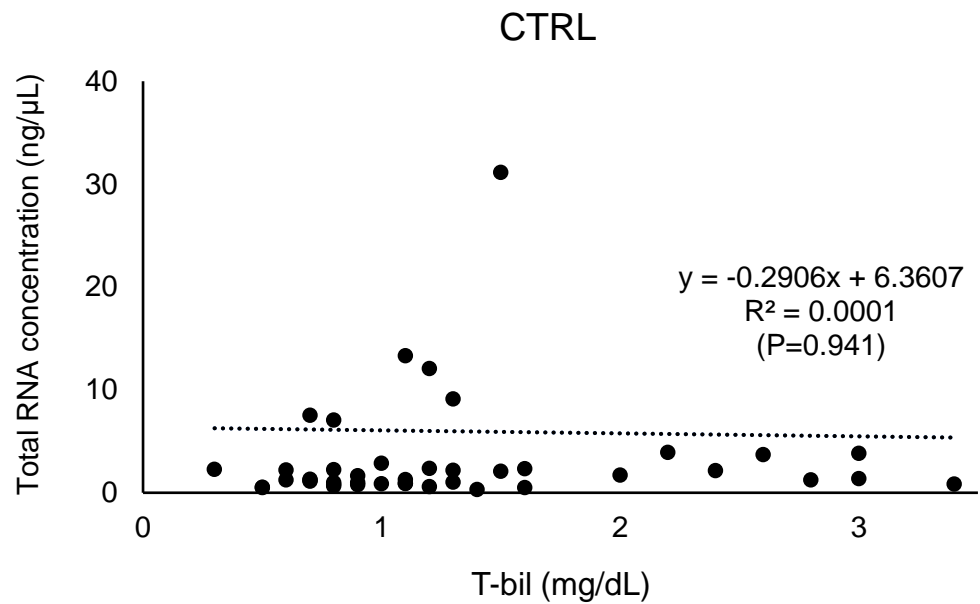

Supplementary Figure S1.

Regression analysis of quantity of exosomal RNA in bile. Data on the correlation between total bilirubin level and total RNA concentration were plotted (Left panel, BTC group, N=45; right panel, CTRL group, N=43).  $R^2$ , Pearson correlation coefficient. P-value, statistical analysis for comparisons. BTC, biliary tract cancer; CTRL, control; T-Bil, total bilirubin.
